# Supplementary material for: Inherent low Erk and p38 activity reduce Fas Ligand expression and degranulation in T helper 17 cells leading to activation induced cell death resistance
Source: PubMed Central journal article supplement (PMC5342346; doi:10.18632/oncotarget.10913), 2016-07-28
Supplement: oncotarget-07-54339-s001.pdf [file oncotarget-07-54339-s001.pdf]

# Inherent low Erk and p38 activity reduce Fas Ligand expression and degranulation in T helper 17 cells leading to activation induced cell death resistance

## Supplementary Material

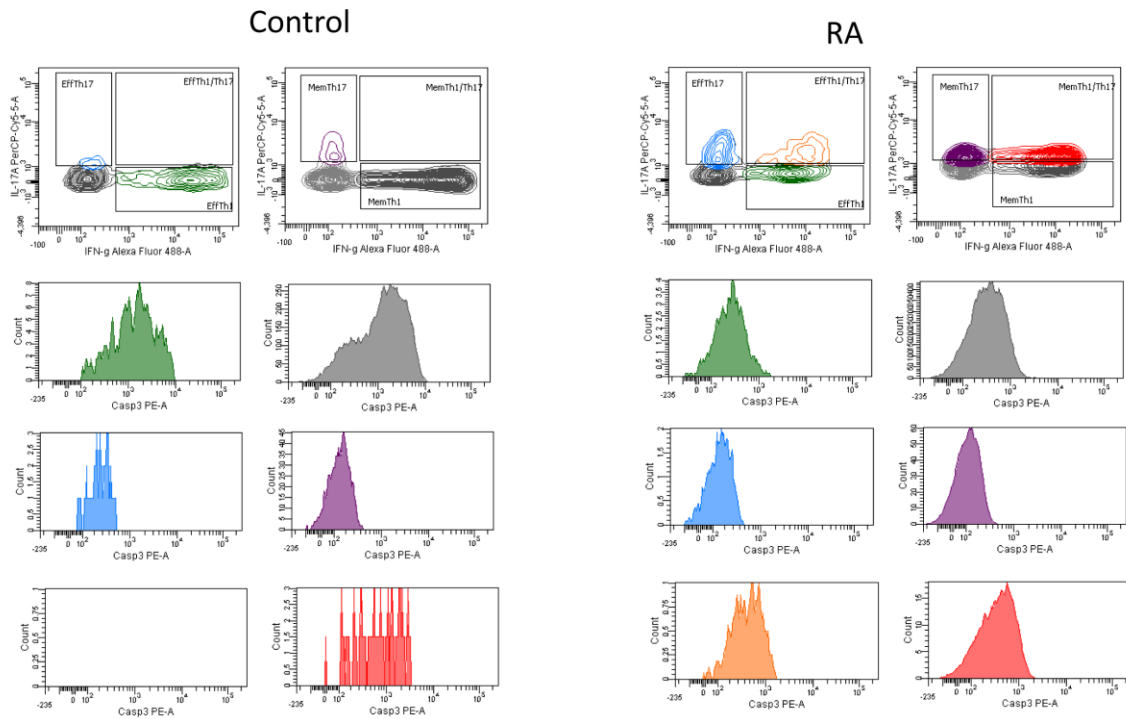

### Supplement Figure.1.Characterization of RA and control T helper cells AICD:

Representative figure for detailed analysis of active caspase3 of Th1, Th17 and Th1/Th17 cells derived from effector (left) and memory (right) compartments in control (n=6) and RA (n=9).

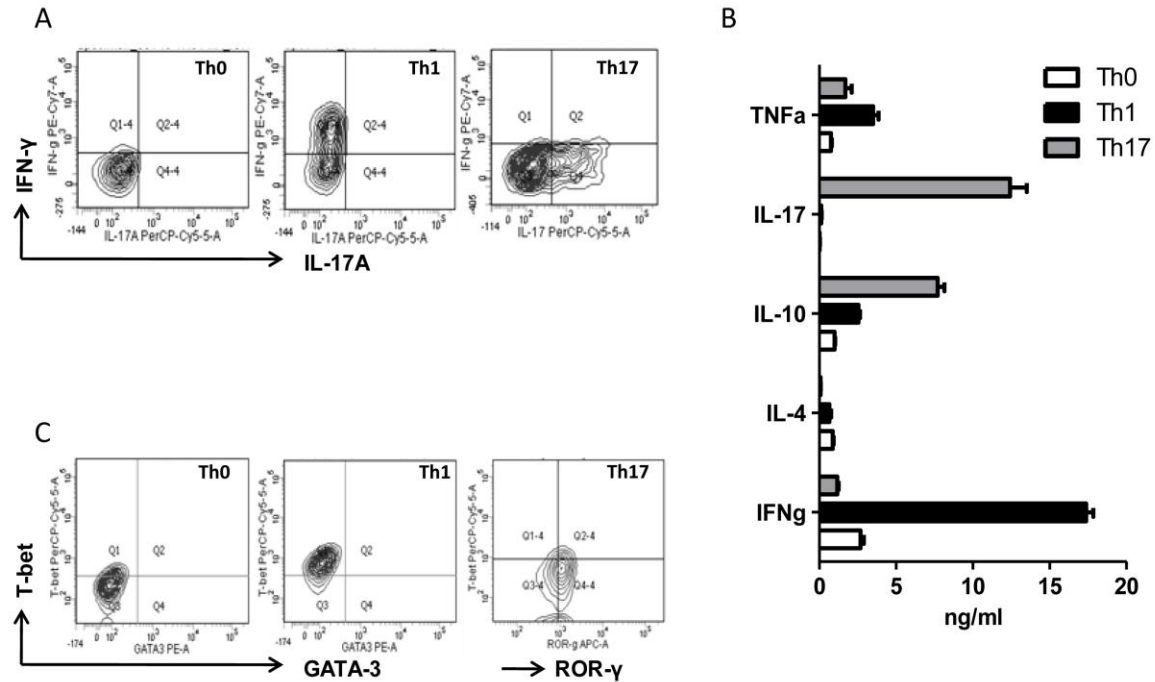

**Supplement Figure.2.Characterization of in-vitro generated T helper cells:** Representative figure for (A) intracellular cytokines and (C) transcription factors analysis of *in-vitro* generated mouse Th0, Th1 and Th17 cells. (B) Multiplex cytokine quantification from anti-CD3e stimulated mouse Th0, Th1 and Th17 culture supernatant.

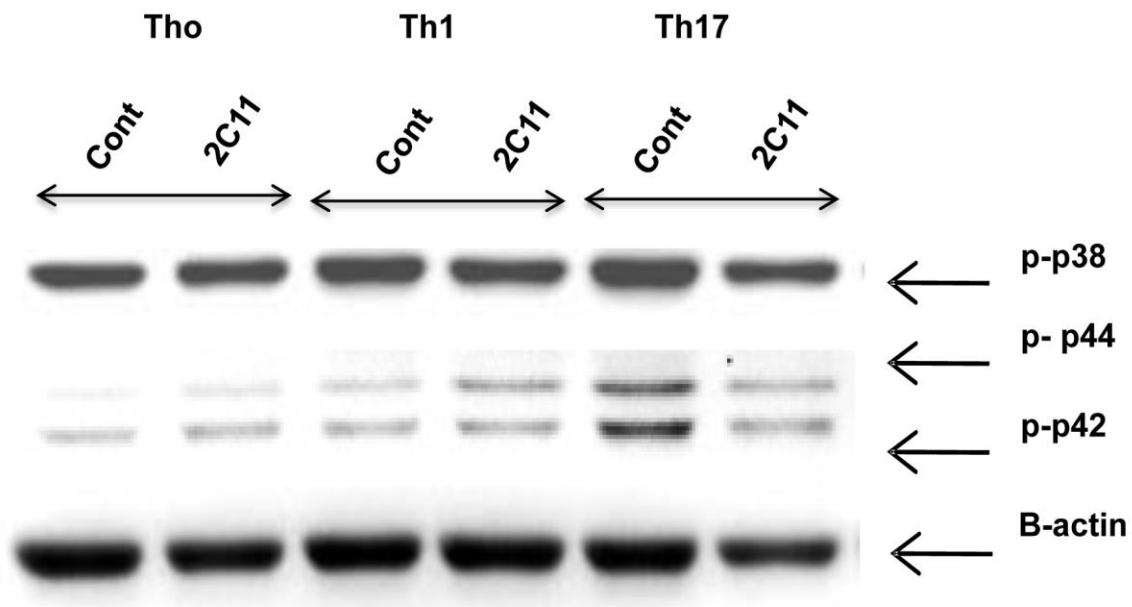

**Supplement Figure.3. Western blot analysis of MAPK activity in T helper cells:**

Representative Western Blot of phospho-p38, phospho-p44 and phospho-p42 with  $\beta$ - actin as loading control in secondary cross-linked mouse Th0, Th1 and Th17 cells.

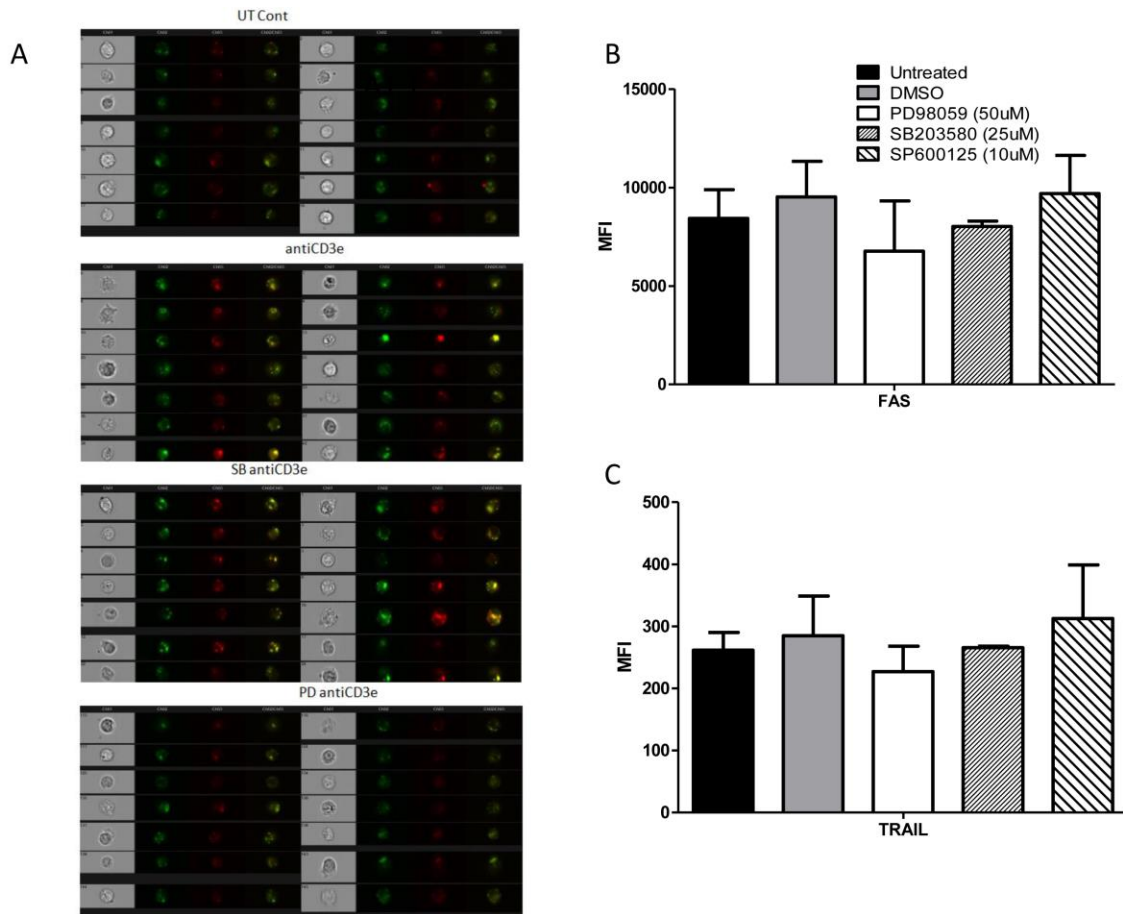

**Supplement Figure.4. MAPK on FasL, Fas and Trail expression in T helper cells: A1.1**

cells stimulated with anti-CD3e in the presence or absence of MAPK inhibitors were analyzed for (A) FasL (a representative imaging flow data), (B) Fas (Bar graph of Mean  $\pm$  SEM) and (C) TRAIL (Bar graph of Mean  $\pm$  SEM) expressions.

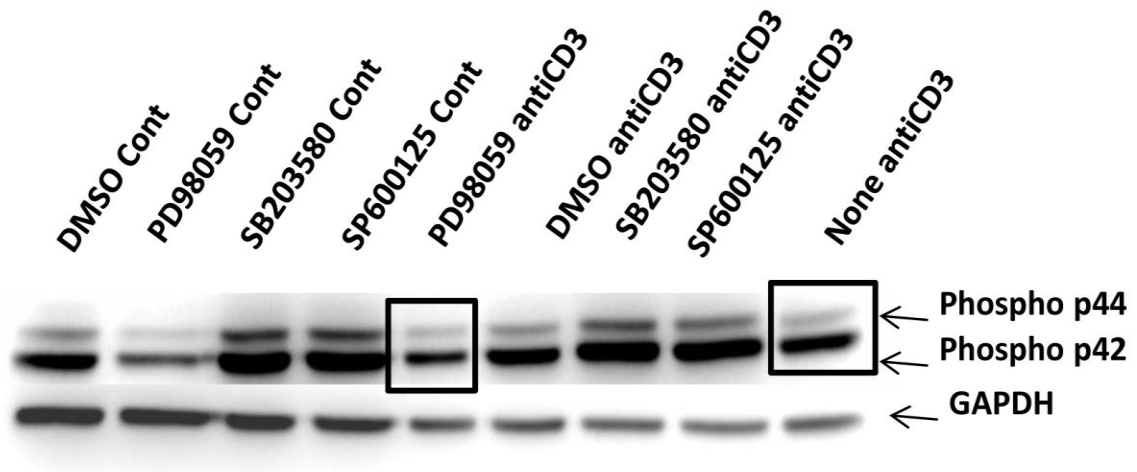

**Supplement Figure.5. Specificity of MAPK inhibitors on Erk1/2 activity in T helper cells:**

WB analysis of phospho-p44 and phospho-p42 with GAPDH as loading control in secondary cross-linked A1.1 cells.

**Table 1: Demographic data of Human RA and control subjects**

|                          | <b>RA (n=27)</b> | <b>HC (n=15)</b> |
|--------------------------|------------------|------------------|
| Age (yrs)                | 39.3 ± 8.3       | 30.5 ± 3.6       |
| sex                      | M:4/F:23         | M:5/F:10         |
| ESR DAS score            | 5.89 ± 1.6       | NA               |
| Disease duration (month) | 31.7 ± 32        | NA               |
| Drugs                    | DMARD            | No drugs         |
